# Supplementary material for: Mechanism of the Synergistic Toxicity of Ampicillin and Cefazoline on Selenastrum capricornutum
Source: MDPI journal article supplement (doi:10.3390/toxics12030217), 2024-03-14
Supplement: s1 [file s1]

## Supporting Information

### Synergistic mechanism of ampicillin and cefazoline on *Selenastrum capricornutum*

Feng-Ling Huang<sup>a</sup>, Li-Tang Qin<sup>a,b,c,\*</sup>, Ling-Yun Mo<sup>b,c,d</sup>, Hong-Hu Zeng<sup>a,b,c</sup>, Yan-Peng Liang<sup>a,b,c</sup>

<sup>a</sup>College of Environment Science and Engineering, Guilin University of Technology, Guilin 541004, China

<sup>b</sup>Guangxi Key Laboratory of Environmental Pollution Control Theory and Technology, Guilin 541004, China

<sup>c</sup>Collaborative Innovation Center for Water Pollution Control and Water Safety in Karst Area, Guilin University of Technology, Guilin 541004, China

<sup>d</sup>Technical Innovation Center of Mine Geological Environmental Restoration Engineering in Southern Karst Area, Nanjing 530029, China

## Contents

**Figure S1** Testing and analysis process

**Figure S2** Four major database annotations Venn diagrams

**Figure S3** GO secondary classification chart

**Figure S4A** Sample principal component analysis

**Figure S4B** Sample correlation heatmap

**Figure S5** GO terms

**Figure S6** KEGG pathway

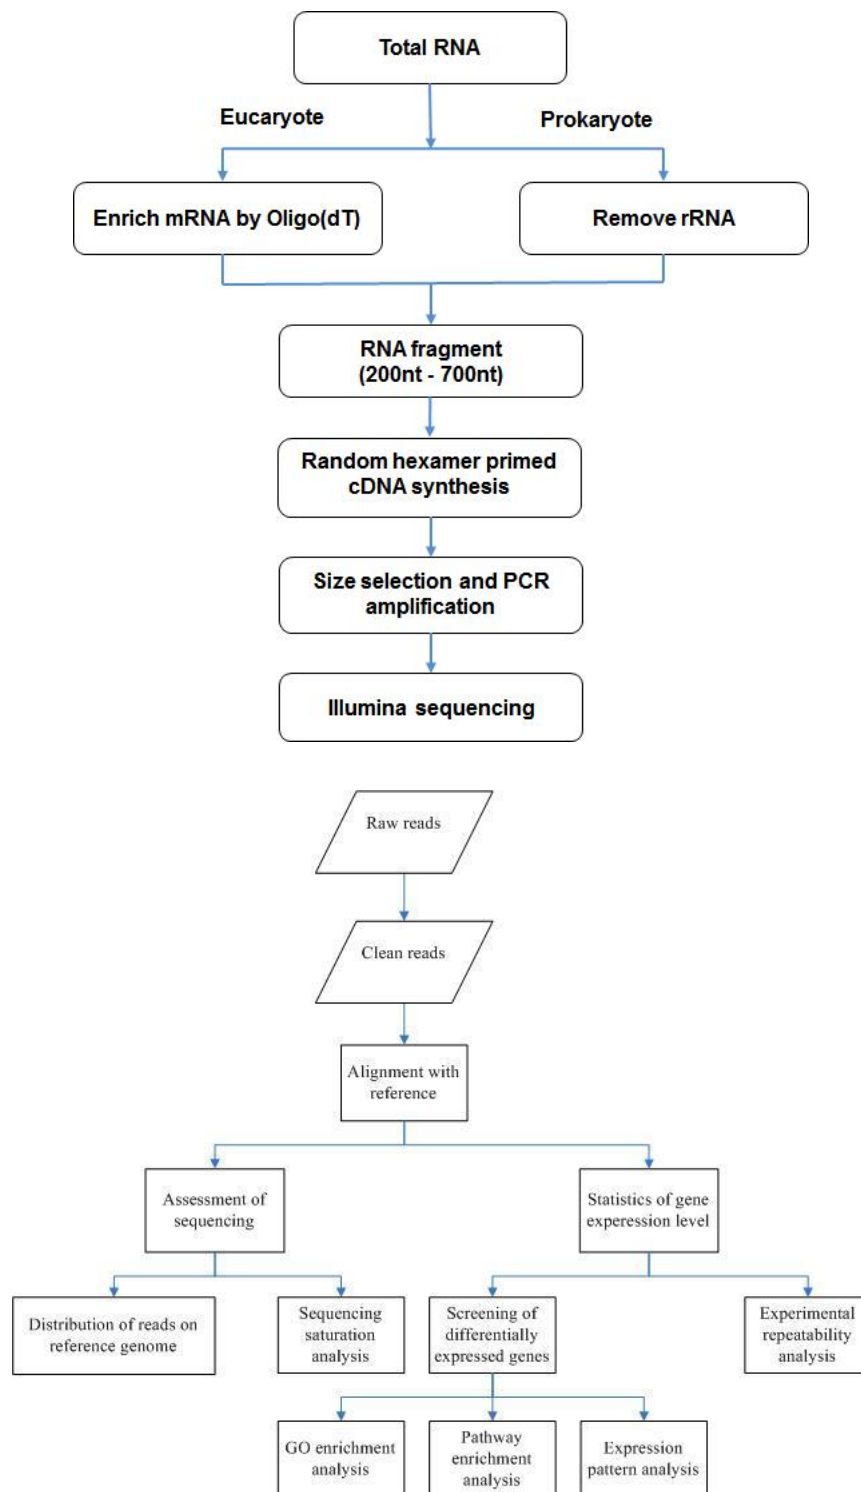

**Figure S1 Testing and analysis process**

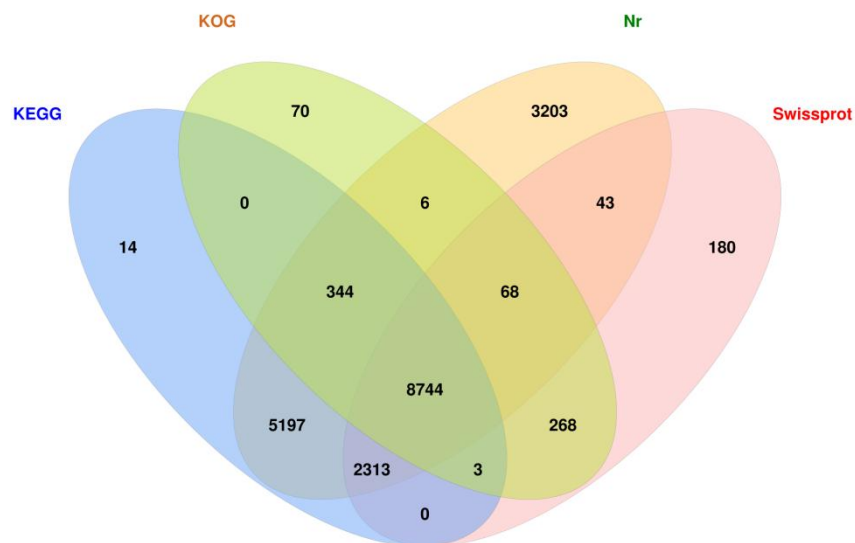

Figure S2 Four major database annotations Venn diagrams

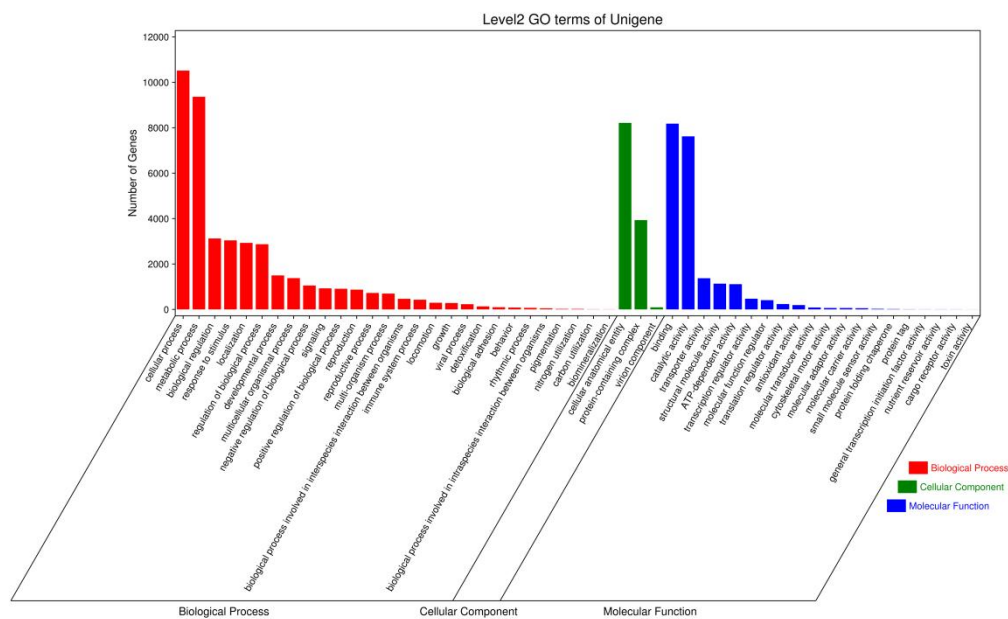

Figure S3 GO secondary classification chart

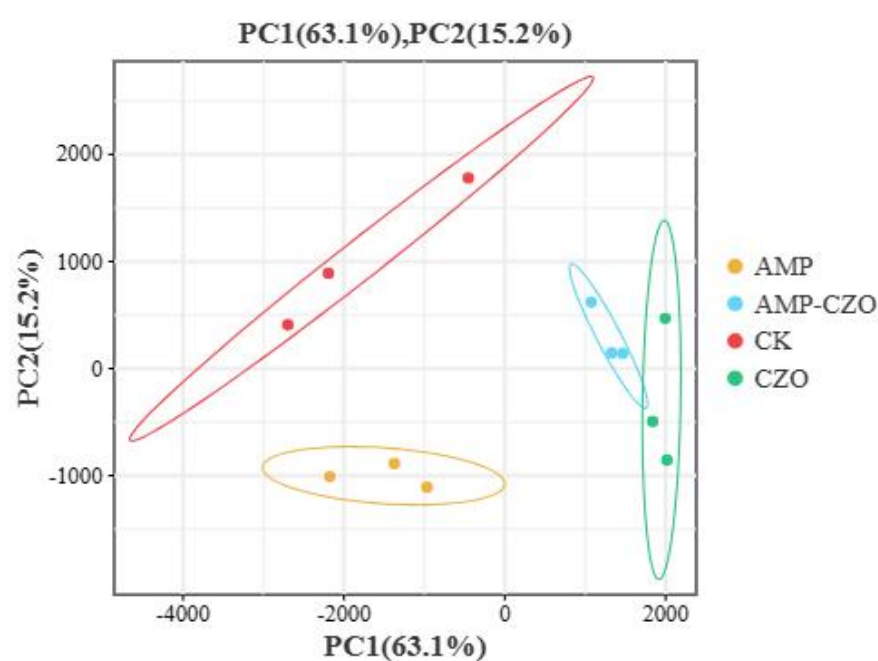

Figure S4A Sample principal component analysis

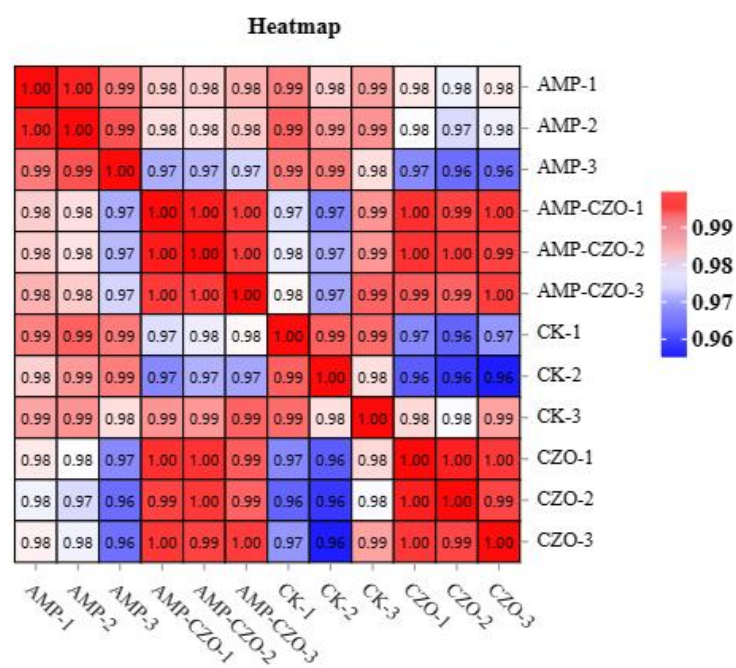

Figure S4B Sample correlation heatmap

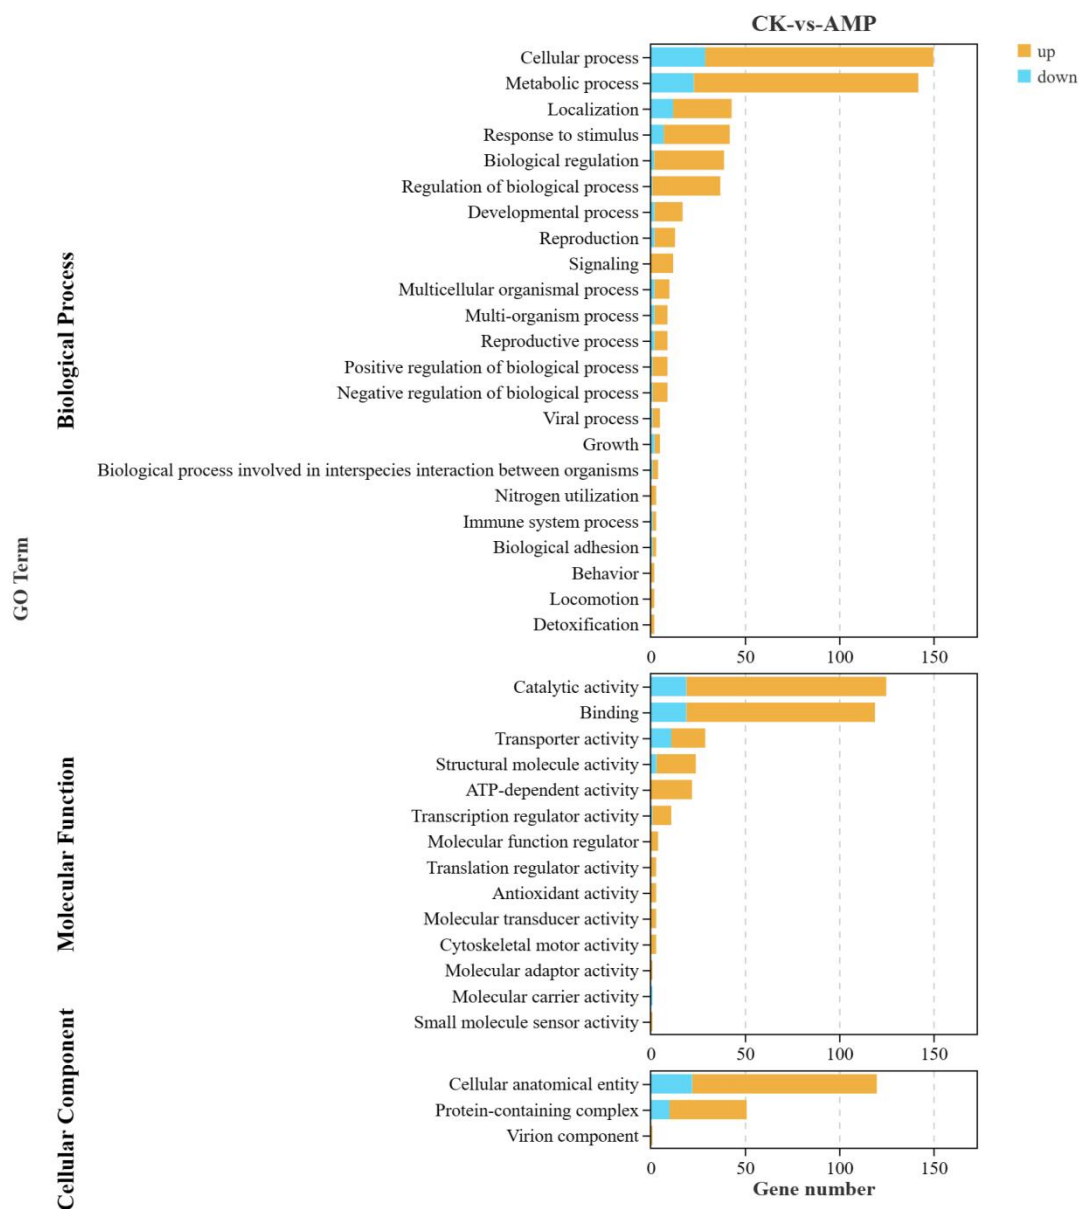

A

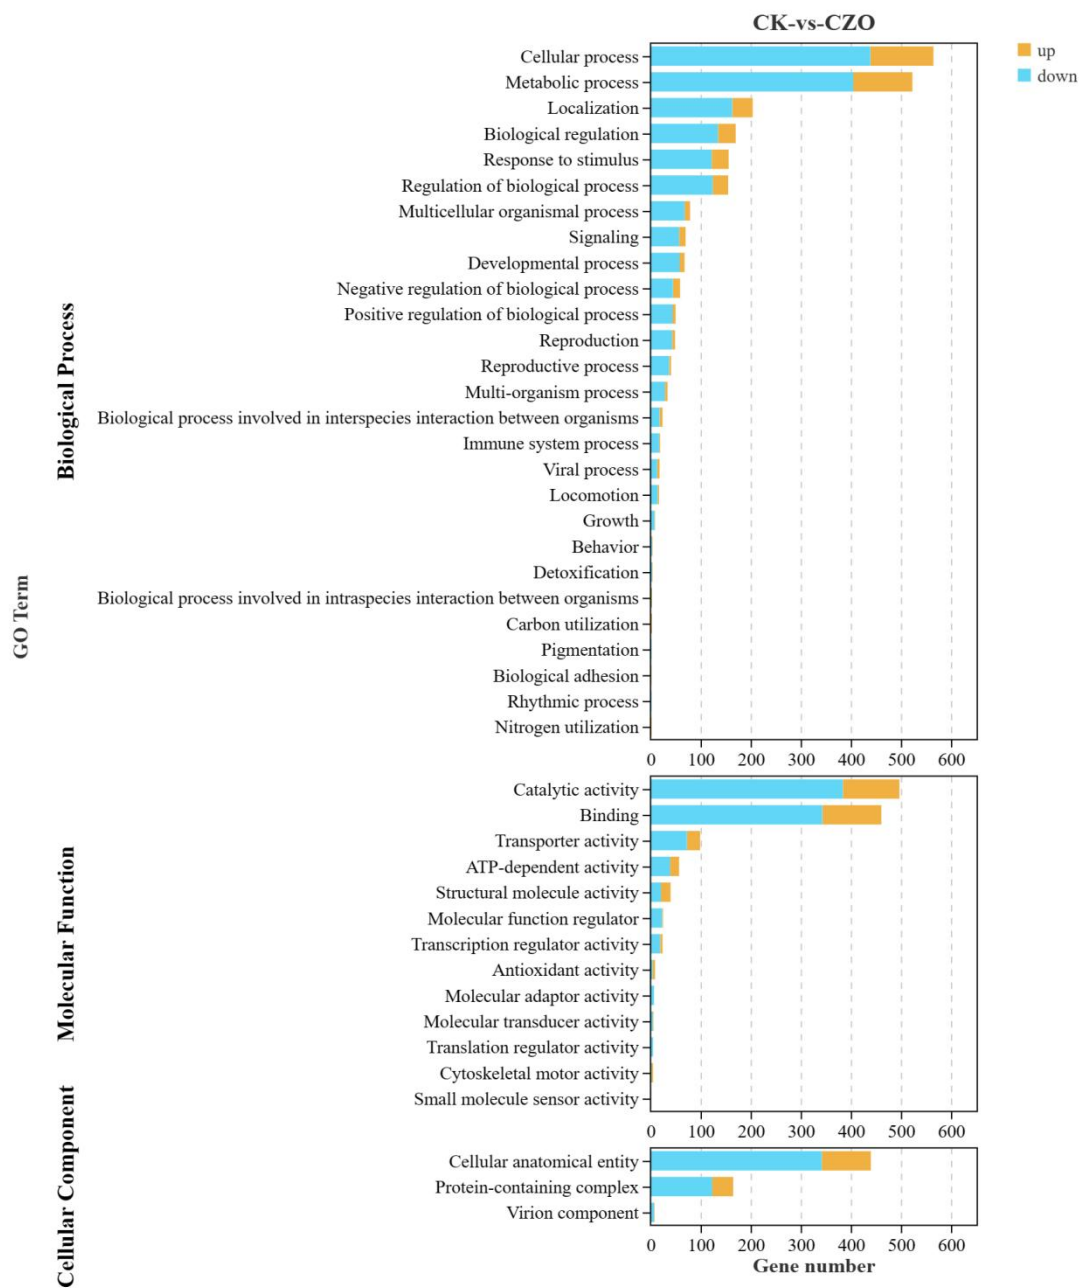

**B**

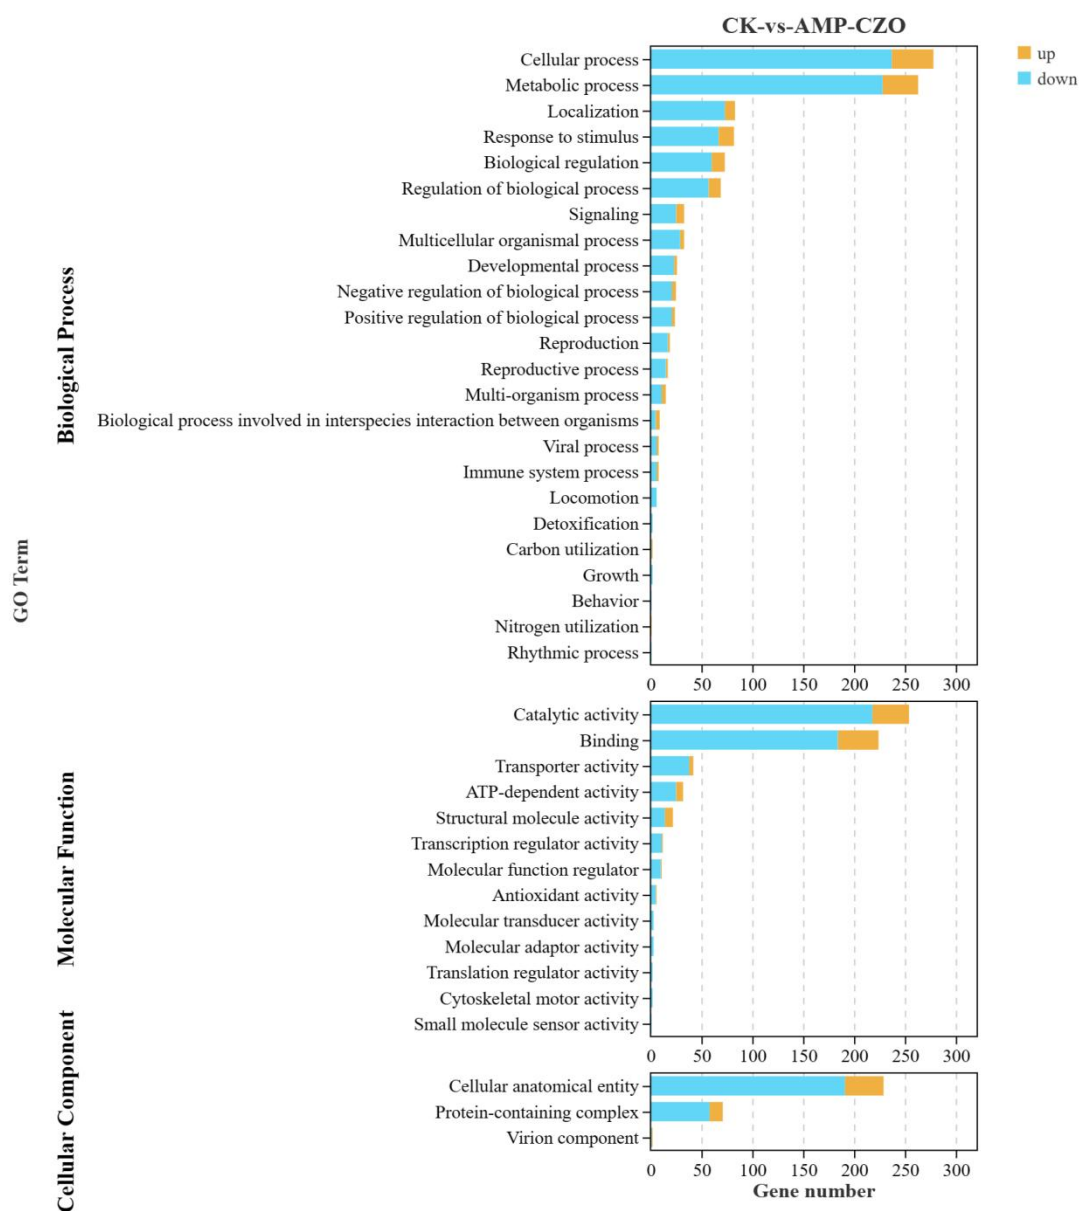

**C**

**Figure S5 GO terms**

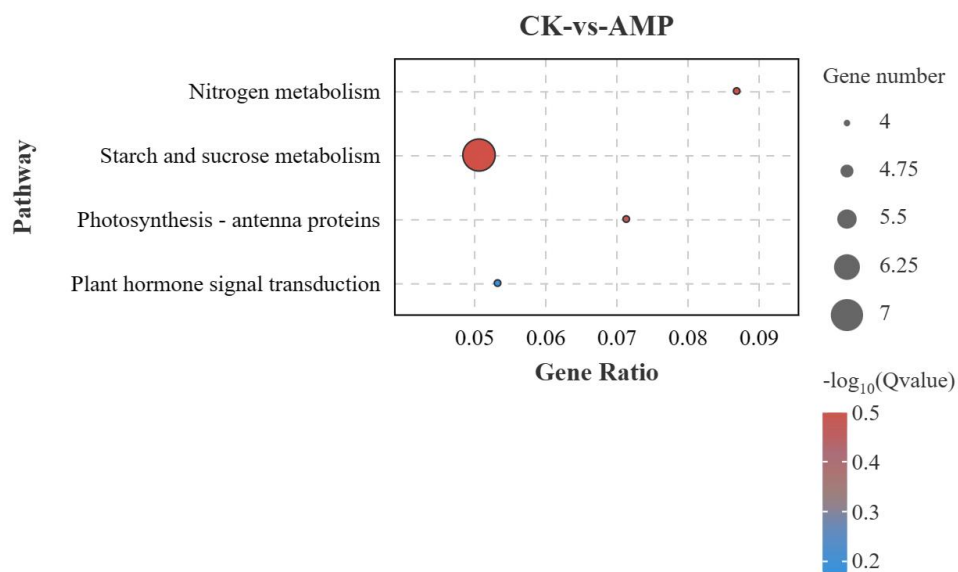

A

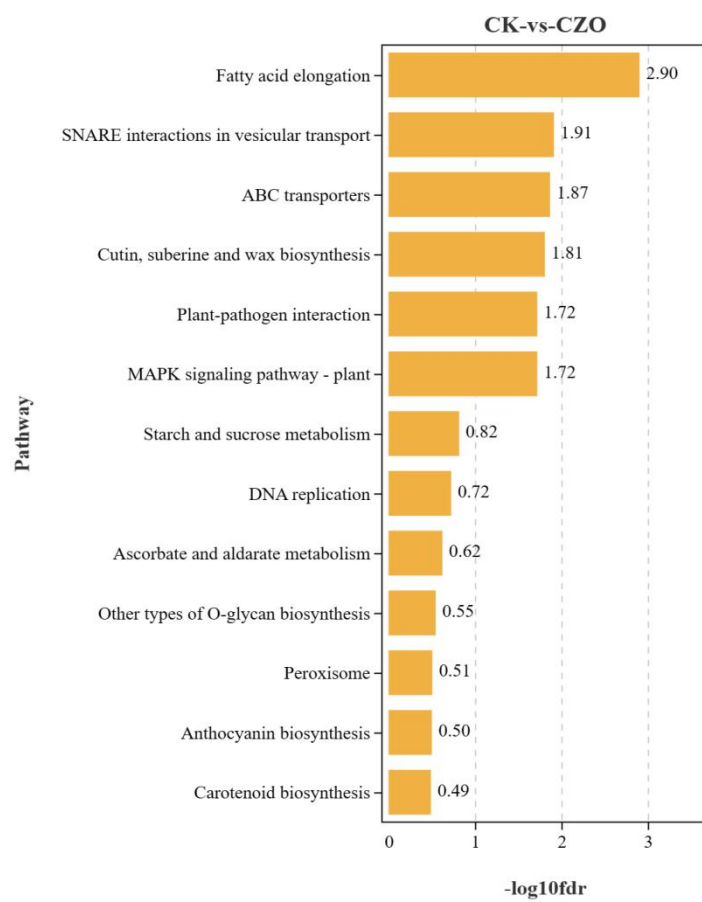

B



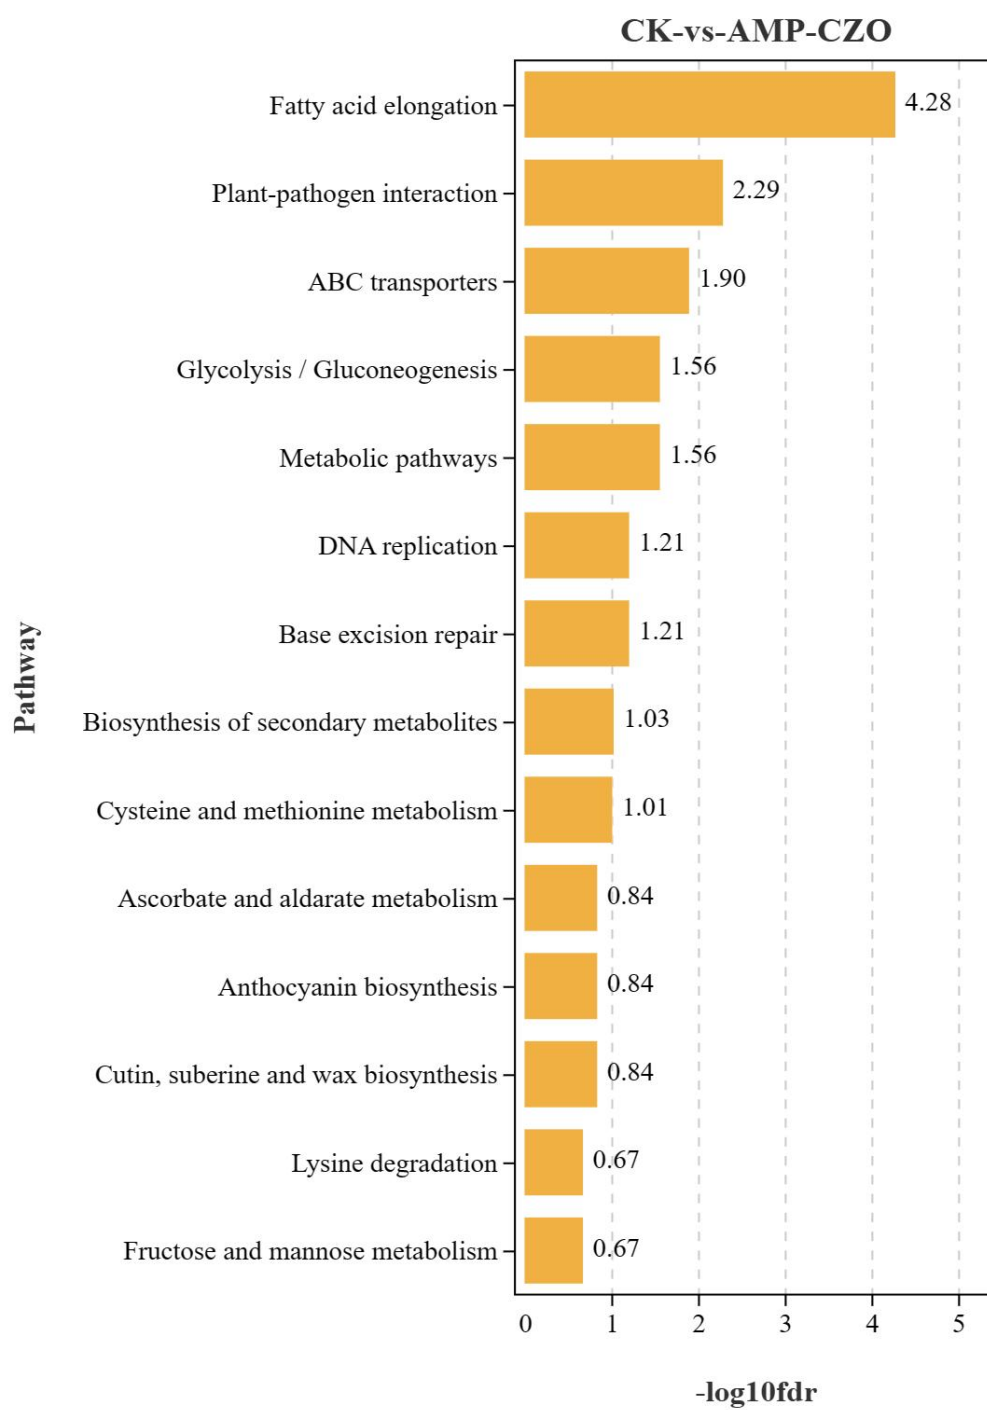

C

**Figure S6 KEGG pathway**
